# Supplementary material for: Structural basis for preferential binding of human TCF4 to DNA containing 5-carboxylcytosine
Source: PubMed Central journal article supplement — Nucleic Acids Res. 2019 May 13;47(16):8375–87. doi: 10.1093/nar/gkz381 (PMC6895265; doi:10.1093/nar/gkz381), 2019-05-13
Supplement: gkz381_supplemental_file.pdf [file gkz381_supplemental_file.pdf]

## **Supplementary Data**

### **Structural basis for preferential binding of human TCF4 to DNA containing 5-carboxylcytosine**

Jie Yang<sup>1</sup>, John R. Horton<sup>1</sup>, Jia Li<sup>2</sup>, Yun Huang<sup>2</sup>, Xing Zhang<sup>1</sup>, Robert M. Blumenthal<sup>3</sup>, Xiaodong Cheng<sup>1,\*</sup>

<sup>1</sup> Department of Molecular and Cellular Oncology, The University of Texas MD Anderson Cancer Center, Houston, TX 77030, USA

<sup>2</sup> Center for Epigenetics & Disease Prevention, Institute of Biosciences and Technology, College of Medicine, Texas A&M University, Houston, TX 77030, USA

<sup>3</sup> Department of Medical Microbiology and Immunology, and Program in Bioinformatics, The University of Toledo College of Medicine and Life Sciences, Toledo, OH 43614, USA

\*To whom correspondence should be addressed: Email: [xcheng5@mdanderson.org](mailto:xcheng5@mdanderson.org)

All authors email addresses:

JY ([jyang19@mdanderson.org](mailto:jyang19@mdanderson.org)); JRH ([jrhorton@mdanderson.org](mailto:jrhorton@mdanderson.org)); JL ([jli@ibt.tamhsc.edu](mailto:jli@ibt.tamhsc.edu));

YH ([yun.huang@ibt.tamhsc.edu](mailto:yun.huang@ibt.tamhsc.edu)); XZ ([xzhang21@mdanderson.org](mailto:xzhang21@mdanderson.org)); RMB

([robert.blumenthal@utoledo.edu](mailto:robert.blumenthal@utoledo.edu))

**6 Supplementary Figures and 1 Supplementary Table**

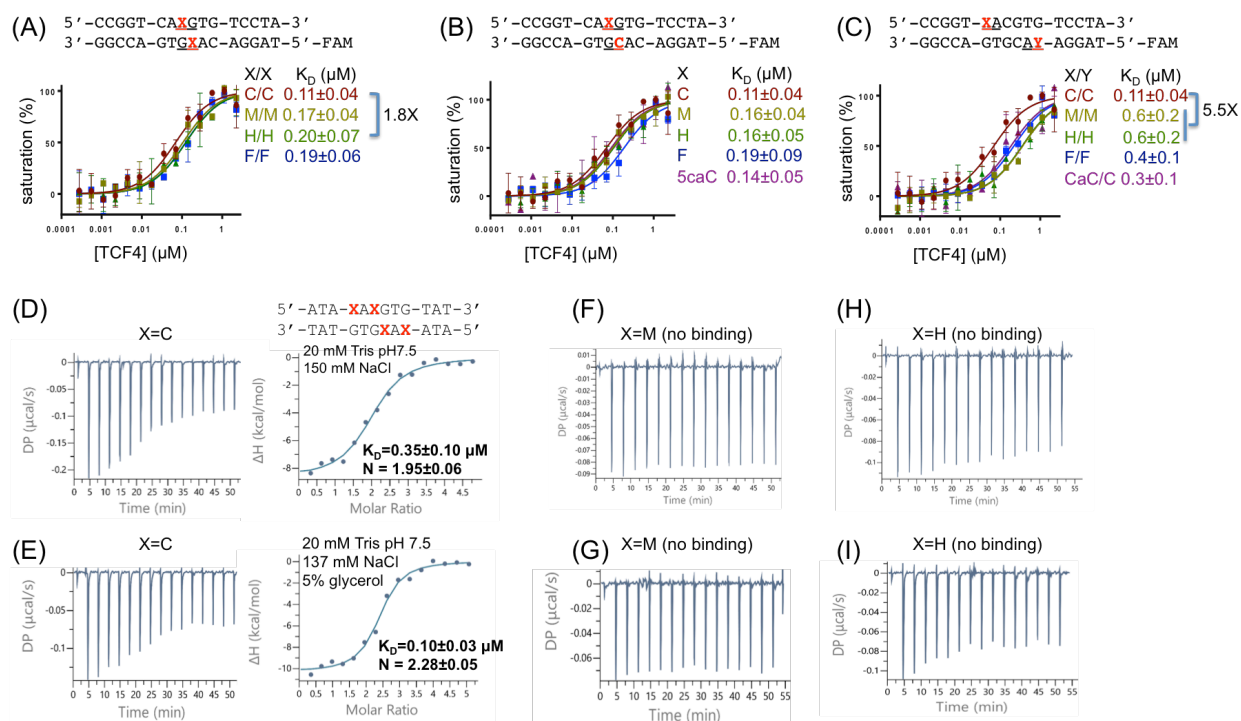

### Supplementary Figure S1. Related to Table 1A-1D

(A-C) The FP measurements of  $K_D$  values by various cytosine modifications of oligonucleotides at central CpG site (A and B) or CpA sites (C) against TCF4 bHLH domain. (D-E) The ITC measurement of  $K_D$  values by unmodified oligonucleotide was carried out under the setup conditions of [dsDNA] = 3.3  $\mu$ M being kept in the sample cell and [TCF4] (monomer) = 77.7  $\mu$ M being injected into the cell by a syringe under two buffer conditions. The derived  $K_D$  values are sensitive to ionic strength and glycerol. (F-I) No bindings were observed for modifications (M or H) at all cytosines.

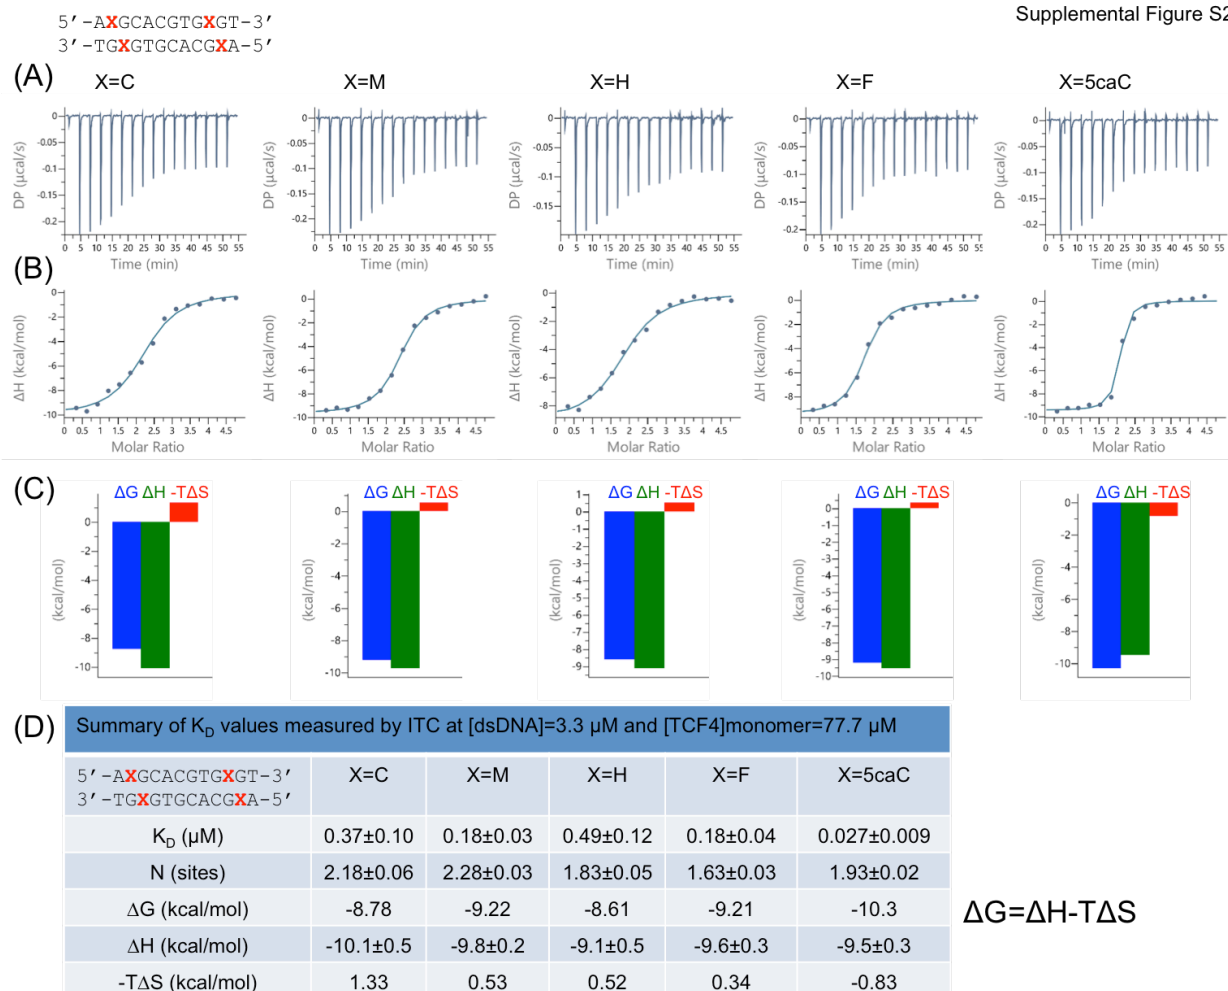

### Supplementary Figure S2. Related to Table 1E

The ITC measurements of  $K_D$  values by various cytosine modifications of oligonucleotides were carried out under the conditions that the TCF4 protein ([monomer] = 77.7  $\mu$ M) was titrated into the sample cell ([dsDNA] = 3.3  $\mu$ M). (A) The raw data of an exothermic reaction releases heat that gives negative peaks. (B) The peaks are integrated as a function of molar ratio of [TCF4]/[DNA]. (C) The binding thermodynamic parameters (free energy  $\Delta G$ , binding enthalpy  $\Delta H$  and entropy  $-T\Delta S$ ) are plotted for each modification. (D) The corresponding table summarizes the ITC parameters including equilibrium dissociation constant ( $K_D$ ) and stoichiometry (N).

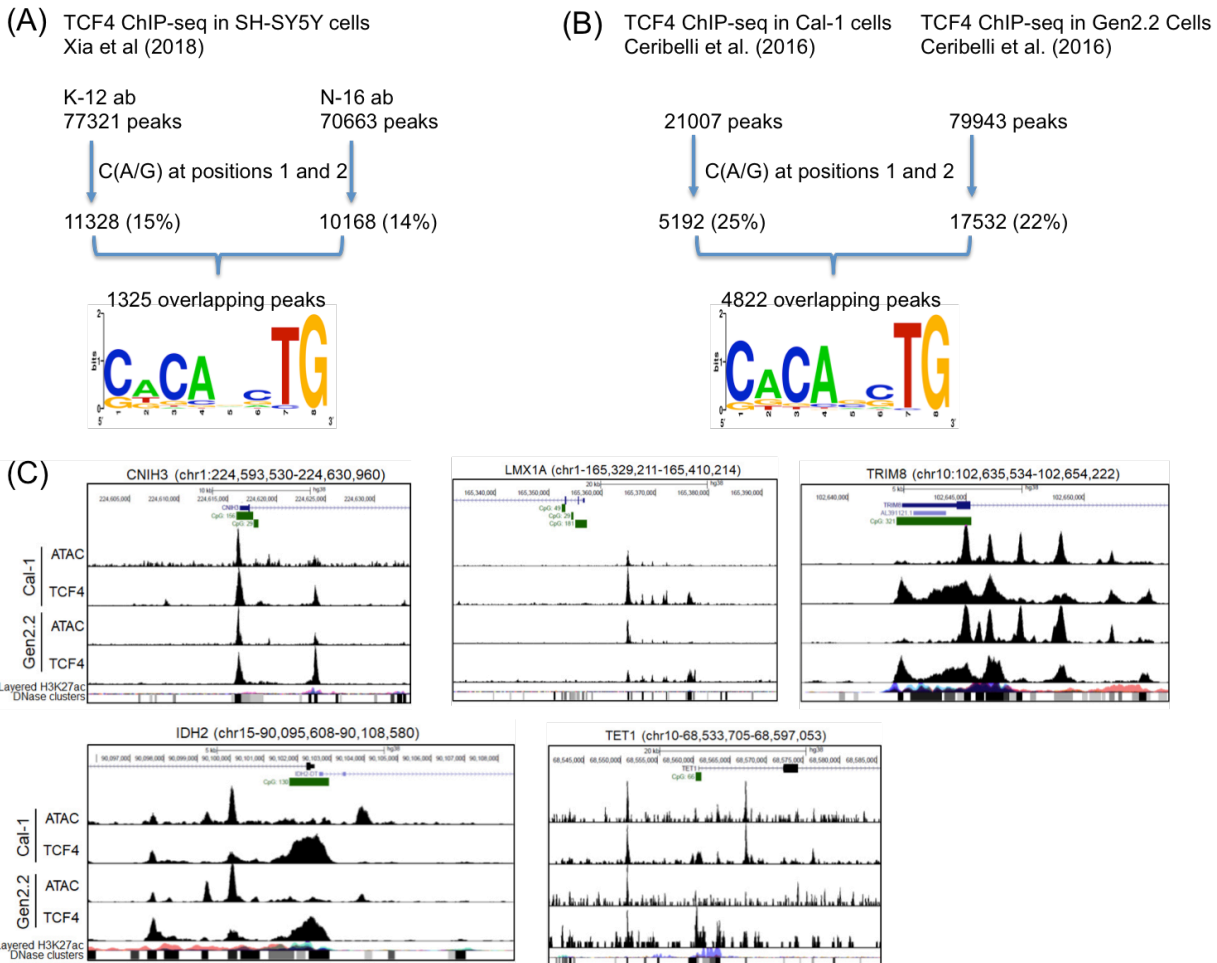

**Supplementary Figure S3. Examples of TCF4 binding sites containing 5' C(A/G) immediately adjacent to the E-box.** The numbers of TCF4 binding sites (FDR/qvalue < 0.05) were extracted from published ChIP-seq datasets. **(A)** Xia et al. used two different antibodies in neuroblastoma cells (SH-SY5Y): K-12 (GSE112704) and N-16 (GSE112704). Approximately 14-15% sites contain C(A/G) at positions 1 and 2. However, only 1325 (~8%) of these binding sites overlap between the two datasets, which were utilized to yield the binding motif. **(B)** Ceribelli et al. used two blastic plasmacytoid dendritic cell neoplasm cells: Cal-1 (ChIP-seq: GSM1975018 and ATAC-seq: GSM2243033) and Gen2.2 (ChIP-seq: GSM1975020 and ATAC-seq: GSM2243034). Approximately 22-25% sites contain C(A/G) at positions 1 and 2 and 4822 of these binding sites overlap between the two datasets, which we used to derive the binding motif. **(C)** Examples of genes associated with the TCF4 binding site containing 5' C(A/G) immediately adjacent to the E-box.

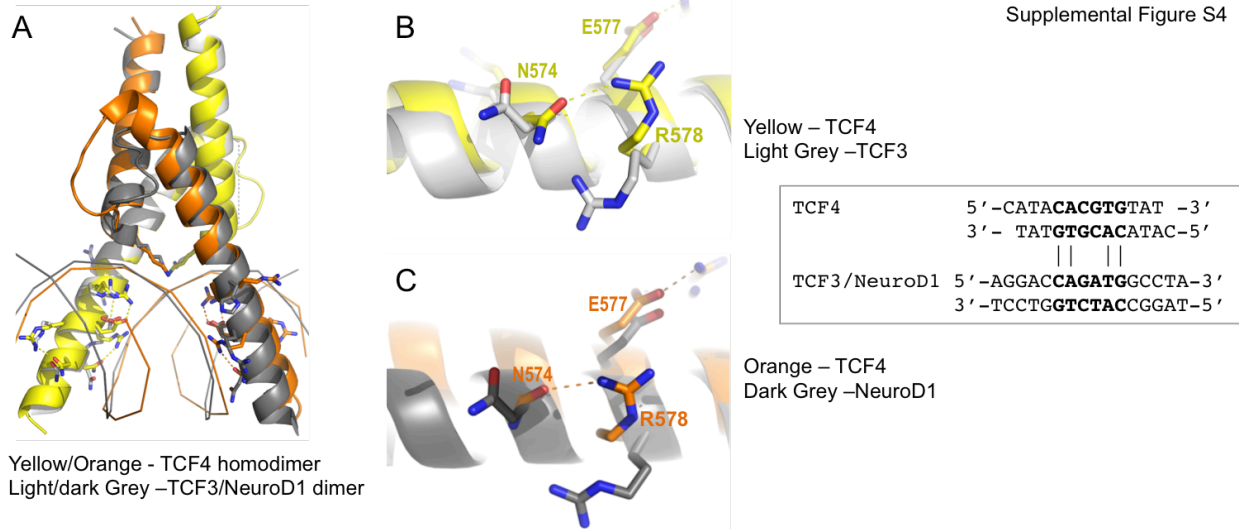

### Supplementary Figure S4. Comparison between TCF4 and TCF3

(A) Superimposition of TCF4 homodimer (yellow and orange) and TCF3/NeuroD1 heterodimer (dark and light grey). (B-C) The N475•••R578 interaction in TCF4 is broken in TCF3 (panel C) and NeuroD1 (panel D) when in complex with asymmetric central dinucleotide. The single H-bond between G1 and R578 in TCF4 (Figure 5C) was absent in the TCF3-NeuroD1 heterodimer bound with an asymmetric sequence (5'-CATCTG-3') (PDB 2QL2).

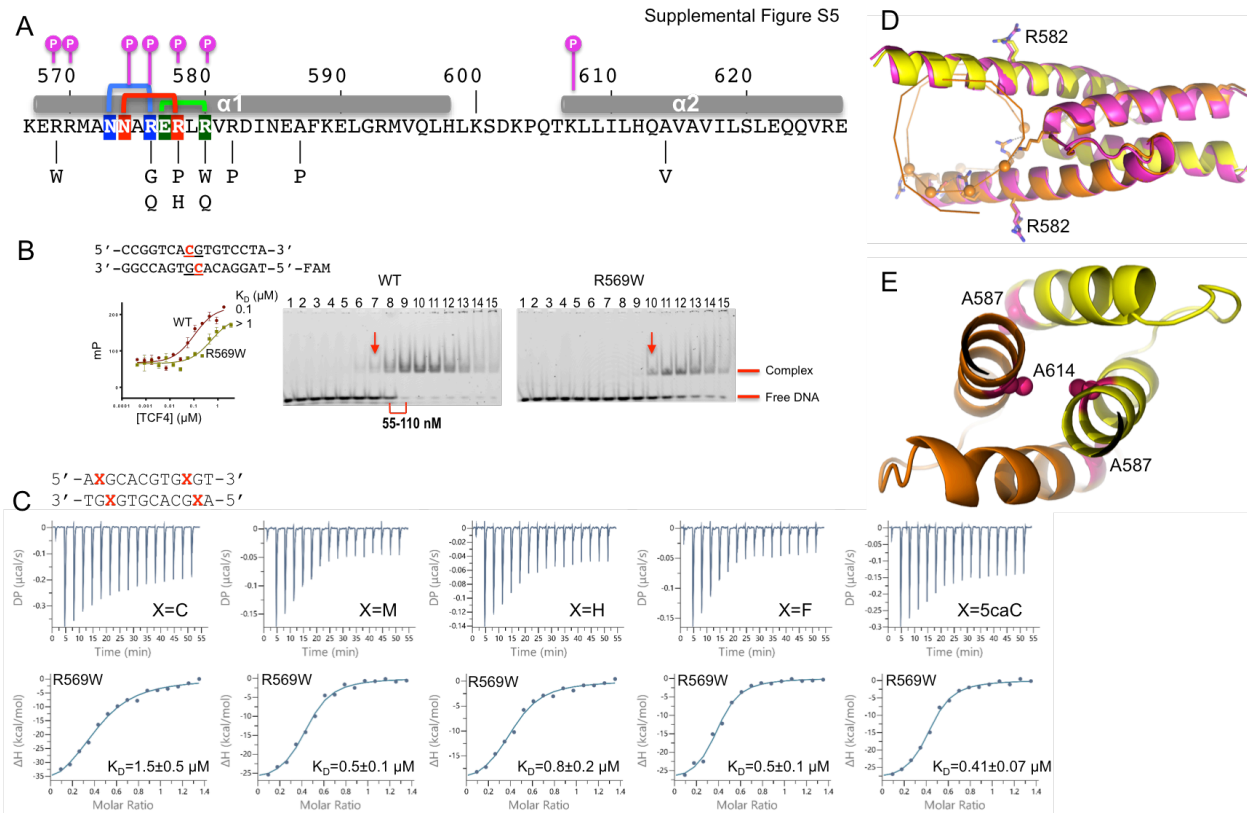

### Supplementary Figure S5. Mutant R569W

(A) Pitt-Hopkins mutations in TCF4 bHLH are indicated below the sequence, along with residues for making DNA phosphate contacts (white letter P in magenta background above the sequence). Three pairs of intra-molecular interactions exist in the major groove of DNA: N573•••R576 (blue), N574•••R578 (red) and E577•••R580 (green). (B) One Pitt-Hopkins associated mutant (R569W) diminished DNA binding as measured by FP and EMSA. (C) ITC measurement using DNA (40  $\mu\text{M}$ ) in syringe and R569W mutant (6  $\mu\text{M}$ ) in sample cell (20 mM Tris, pH 7.5 and 137 mM NaCl, 5% glycerol). (D) R582 is not engaged in DNA binding in TCF4-DNA cognate complex. (E) An A614V variant is likely to interfere with the dimer interaction. The L587P, located on the outer surface of helix 1, has the potential to alter helix conformation and the dimer interaction.

■ = Substitutions relative to *H. sapiens* TCF4; ■ = Residues changed in Pitt-Hopkins Syndrome

| Class in Vertebrata | Species                          | TCF4 bHLH Region                                                                                                                                                                                                 | GenBank #    |
|---------------------|----------------------------------|------------------------------------------------------------------------------------------------------------------------------------------------------------------------------------------------------------------|--------------|
| Mammalia            | <i>Homo sapiens</i>              | KE <span style="background-color: yellow;">R</span> RMANNARER <span style="background-color: yellow;">L</span> RV <span style="background-color: yellow;">R</span> DINEAFKELGRMVQLHLKSDKPQTKLLILHQAVAVILSLEQQVRE | CBY80191     |
| Aves                | <i>Gallus gallus</i>             | KE <span style="background-color: yellow;">R</span> RMANNARER <span style="background-color: yellow;">L</span> RV <span style="background-color: yellow;">R</span> DINEAFKELGRMVQLHLKSDKPQTKLLILHQAVAVILSLEQQVRE | Q90683       |
| Reptilia            | <i>Anolis carolinensis</i>       | KE <span style="background-color: yellow;">R</span> RMANNARER <span style="background-color: yellow;">L</span> RV <span style="background-color: yellow;">R</span> DINEAFKELGRMVQLHLKSDKPQTKLLILHQAVAVILSLEQQVRE | XP_016850729 |
| Amphibia            | <i>Xenopus tropicalis</i>        | KE <span style="background-color: yellow;">R</span> RMANNARER <span style="background-color: yellow;">L</span> RV <span style="background-color: yellow;">R</span> DINEAFKELGRMVQLHLKSDKPQTKLLILHQAVAVILSLEQQVRE | NP_001096226 |
| Osteichthyes        | <i>Lepisosteus oculatus</i>      | KE <span style="background-color: yellow;">R</span> RMANNARER <span style="background-color: yellow;">L</span> RV <span style="background-color: yellow;">R</span> DINEAFKELGRMVQLHLKSDKPQTKLLILHQAVAVILSLEQQVRE | XP_015217707 |
| Chondrichthyes      | <i>Rhincodon typus</i>           | <span style="background-color: purple;">R</span> ERMANNARER <span style="background-color: yellow;">L</span> RV <span style="background-color: yellow;">R</span> DINEAFKELGRMVQLHLKSDKPQTKLLILHQAVAVILSLEQQVRE   | XP_020365982 |
| Agnatha             | <i>Lethenteron camtschaticum</i> |                                                                                                                                                                                                                  | (none found) |

  

| Class in Vertebrata | Species                          | TCF12 bHLH Region                                                                                                                                                                                                                                                                                                 | GenBank #    |
|---------------------|----------------------------------|-------------------------------------------------------------------------------------------------------------------------------------------------------------------------------------------------------------------------------------------------------------------------------------------------------------------|--------------|
| Mammalia            | <i>Homo sapiens</i>              | KE <span style="background-color: yellow;">R</span> RMANNARER <span style="background-color: yellow;">L</span> RV <span style="background-color: yellow;">R</span> DINEAFKELGRM <span style="background-color: yellow;">Q</span> LHLKSE <span style="background-color: yellow;">K</span> PQTKLLILHQAVAVILSLEQQVRE | XP_011520261 |
| Aves                | <i>Gallus gallus</i>             | KE <span style="background-color: yellow;">R</span> RMANNARER <span style="background-color: yellow;">L</span> RV <span style="background-color: yellow;">R</span> DINEAFKELGRM <span style="background-color: yellow;">Q</span> LHLKSE <span style="background-color: yellow;">K</span> PQTKLLILHQAVAVILSLEQQVRE | XP_015134250 |
| Reptilia            | <i>Anolis carolinensis</i>       | <span style="background-color: purple;">R</span> ERMANNARER <span style="background-color: yellow;">L</span> RV <span style="background-color: yellow;">R</span> DINEAFKELGRM <span style="background-color: yellow;">Q</span> LHLKSE <span style="background-color: yellow;">K</span> PQTKLLILHQAVAVILSLEQQVRE   | XP_016853254 |
| Amphibia            | <i>Xenopus tropicalis</i>        | KE <span style="background-color: yellow;">R</span> RMANNARER <span style="background-color: yellow;">L</span> RV <span style="background-color: yellow;">R</span> DINEAFKELGRM <span style="background-color: yellow;">Q</span> LHLKSE <span style="background-color: yellow;">K</span> PQTKLLILHQAVAVILNLEQQVRE | XP_002940299 |
| Osteichthyes        | <i>Lepisosteus oculatus</i>      | <span style="background-color: purple;">R</span> ERMANNARER <span style="background-color: yellow;">L</span> RV <span style="background-color: yellow;">R</span> DINEAFKELGRM <span style="background-color: yellow;">Q</span> LHLKSE <span style="background-color: yellow;">K</span> PQTKLLILHQAVAVILSLEQQVRE   | XP_015198688 |
| Chondrichthyes      | <i>Rhincodon typus</i>           | <span style="background-color: purple;">R</span> ERRVANNARER <span style="background-color: yellow;">L</span> RV <span style="background-color: yellow;">R</span> DINEAFKELGRM <span style="background-color: yellow;">Q</span> LHLN <span style="background-color: yellow;">S</span> DKPQTKLLILHQAVSVILNLEQQVRE  | XP_020369765 |
| Agnatha             | <i>Lethenteron camtschaticum</i> |                                                                                                                                                                                                                                                                                                                   | (none found) |

  

| Class in Vertebrata | Species                          | Atonal bHLH Region                                                                                                                                                                                                                                                                                                                                                                                                                                                                                                                                                                                                                                                                                                                                                                                                        | GenBank #    |
|---------------------|----------------------------------|---------------------------------------------------------------------------------------------------------------------------------------------------------------------------------------------------------------------------------------------------------------------------------------------------------------------------------------------------------------------------------------------------------------------------------------------------------------------------------------------------------------------------------------------------------------------------------------------------------------------------------------------------------------------------------------------------------------------------------------------------------------------------------------------------------------------------|--------------|
| Mammalia            | <i>Homo sapiens</i>              | ARRRLLAANARERRRM <span style="background-color: yellow;">Q</span> GLN <span style="background-color: yellow;">T</span> A <span style="background-color: yellow;">F</span> DRL <span style="background-color: yellow;">R</span> RVV <span style="background-color: yellow;">P</span> QW <span style="background-color: yellow;">G</span> Q <span style="background-color: yellow;">D</span> KKLSKYETLQMA <span style="background-color: yellow;">L</span> SY <span style="background-color: yellow;">I</span> MAL <span style="background-color: yellow;">T</span> RILAE                                                                                                                                                                                                                                                   | NP_660161    |
| Aves                | <i>Gallus gallus</i>             | KQRRLAANARERRRM <span style="background-color: yellow;">H</span> GLN <span style="background-color: yellow;">H</span> A <span style="background-color: yellow;">F</span> DQL <span style="background-color: yellow;">R</span> RV <span style="background-color: yellow;">I</span> PS <span style="background-color: yellow;">F</span> N <span style="background-color: yellow;">D</span> DKKLSKYETLQMA <span style="background-color: yellow;">Q</span> I <span style="background-color: yellow;">Y</span> ISALAE <span style="background-color: yellow;">L</span> LHG                                                                                                                                                                                                                                                    | XP_004941187 |
| Reptilia            | <i>Anolis carolinensis</i>       | QTRRLLANARER <span style="background-color: yellow;">T</span> RV <span style="background-color: yellow;">H</span> T <span style="background-color: yellow;">I</span> S <span style="background-color: yellow;">A</span> A <span style="background-color: yellow;">F</span> EAL <span style="background-color: yellow;">R</span> KQ <span style="background-color: yellow;">V</span> PC <span style="background-color: yellow;">Y</span> SYG <span style="background-color: yellow;">Q</span> L <span style="background-color: yellow;">S</span> KLAIL <span style="background-color: yellow;">R</span> IAC <span style="background-color: yellow;">N</span> Y <span style="background-color: yellow;">I</span> L <span style="background-color: yellow;">S</span> LAR <span style="background-color: yellow;">A</span> DL | XP_008117724 |
| Amphibia            | <i>Xenopus tropicalis</i>        | KQRRLAANARERRRM <span style="background-color: yellow;">H</span> GLN <span style="background-color: yellow;">H</span> A <span style="background-color: yellow;">F</span> DQL <span style="background-color: yellow;">R</span> RV <span style="background-color: yellow;">I</span> PS <span style="background-color: yellow;">F</span> N <span style="background-color: yellow;">D</span> DKKLSKYETLQMA <span style="background-color: yellow;">Q</span> I <span style="background-color: yellow;">Y</span> IN <span style="background-color: yellow;">A</span> L <span style="background-color: yellow;">S</span> DL <span style="background-color: yellow;">L</span> QA                                                                                                                                                  | XP_004911142 |
| Osteichthyes        | <i>Lepisosteus oculatus</i>      | KQRRIAANARERRRM <span style="background-color: yellow;">H</span> GLN <span style="background-color: yellow;">H</span> A <span style="background-color: yellow;">F</span> DEL <span style="background-color: yellow;">R</span> SV <span style="background-color: yellow;">I</span> PA <span style="background-color: yellow;">F</span> D <span style="background-color: yellow;">N</span> DKKLSKYETLQMA <span style="background-color: yellow;">Q</span> I <span style="background-color: yellow;">Y</span> IN <span style="background-color: yellow;">A</span> L <span style="background-color: yellow;">S</span> DL <span style="background-color: yellow;">L</span> QG                                                                                                                                                  | XP_006627369 |
| Chondrichthyes      | <i>Rhincodon typus</i>           | KHRRLLAANARERRRM <span style="background-color: yellow;">H</span> GLN <span style="background-color: yellow;">H</span> A <span style="background-color: yellow;">F</span> DEL <span style="background-color: yellow;">R</span> SV <span style="background-color: yellow;">I</span> PA <span style="background-color: yellow;">F</span> D <span style="background-color: yellow;">N</span> DKKLSKYETLQMA <span style="background-color: yellow;">Q</span> I <span style="background-color: yellow;">Y</span> IA <span style="background-color: yellow;">E</span> L <span style="background-color: yellow;">T</span> EL <span style="background-color: yellow;">L</span> QN                                                                                                                                                 | XP_020365853 |
| Agnatha             | <i>Lethenteron camtschaticum</i> | KQRRLAANARERRRM <span style="background-color: yellow;">H</span> GLN <span style="background-color: yellow;">H</span> A <span style="background-color: yellow;">F</span> DRL <span style="background-color: yellow;">R</span> RV <span style="background-color: yellow;">I</span> PS <span style="background-color: yellow;">F</span> AG <span style="background-color: yellow;">D</span> KKLSKYETLQMA <span style="background-color: yellow;">Q</span> I <span style="background-color: yellow;">Y</span> IG <span style="background-color: yellow;">A</span> EL <span style="background-color: yellow;">L</span> KG                                                                                                                                                                                                     | AMN92150     |

Logo for all above sequences:

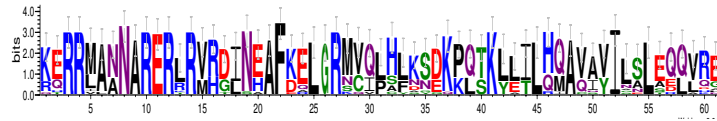

### Supplementary Figure S6. Sequence conservation of bHLH of TCF4 related proteins

The basic helix-loop-helix (bHLH) regions of three related proteins are shown: TCF4 (the subject of this paper), TCF12 (a closely-related transcription factor), and Atonal. Sequences were identified using BlastP (National Center for Biotechnology Information). The species representing different Vertebrata classes are human, chicken, anole, clawed frog, spotted gar, whale shark, and arctic lamprey. Substitutions relative to human TCF4 are highlighted in purple; and residues that, when changed in human TCF4, are associated with Pitt-Hopkins Syndrome are highlighted in yellow. The logo at the bottom (from WebLogo; <http://weblogo.threeplusone.com>) shows conservation of residues among all three proteins from all seven species.

Supplementary Table S1. Summary of X-ray data collection from SERCAT (22-ID) at wavelength of 1 Å and refinement statistics in space group *P1* (\*)

| DNA (5'-3')<br>(3'-5')                                          | CATACACGTGTAT<br>TATGTGCACATAC | TTACACGTGTA<br>ATGTGCACATT | AXGCACGTGXGT<br>TGXGTGCACGXA<br>(X=5caC) |
|-----------------------------------------------------------------|--------------------------------|----------------------------|------------------------------------------|
| PDB Code                                                        | 6OD3                           | 6OD4                       | 6OD5                                     |
| Number of crystals                                              | 1                              | 1                          | 2                                        |
| Cell dimensions (Å)                                             | 41.18, 58.95, 62.72            | 36.61, 43.60, 43.56        | 44.68, 44.76, 54.64                      |
| $\alpha, \beta, \gamma$ (°)                                     | 104.6, 90.3, 94.9              | 97.2, 102.6, 102.5         | 78.6, 78.9, 79.3                         |
| Resolution (Å)                                                  | 37.90-1.49 (1.54-1.49)         | 41.82-1.70 (1.75-1.70)     | 36.66-2.05 (2.12-2.05)                   |
| <sup>a</sup> R <sub>merge</sub>                                 | 0.056 (0.730)                  | 0.103 (0.711)              | 0.063 (0.554)                            |
| R <sub>pim</sub>                                                | 0.033 (0.471)                  | 0.041 (0.418)              | 0.038 (0.412)                            |
| CC <sub>1/2</sub> , CC                                          | (0.627, 0.878)                 | (0.522, 0.828)             | (0.361, 0.729)                           |
| <sup>b</sup> <I/σI>                                             | 21.6 (1.6)                     | 16.4 (3.7)                 | 5.4 (2.0)                                |
| Completeness (%)                                                | 84.1 (70.6)                    | 95.3 (83.1)                | 96.5 (82.8)                              |
| Redundancy                                                      | 3.6 (2.6)                      | 6.2 (3.2)                  | 3.6 (2.2)                                |
| Observed reflections                                            | 320,996                        | 160,484                    | 88,261                                   |
| Unique reflections                                              | 88,521 (7433)                  | 26,021 (2269)              | 24,281 (2094)                            |
| <b>Refinement</b>                                               |                                |                            |                                          |
| Resolution (Å)                                                  | 1.49                           | 1.69                       | 2.05                                     |
| No. reflections                                                 | 88,360                         | 25,959                     | 24,247                                   |
| <sup>c</sup> R <sub>work</sub> / <sup>d</sup> R <sub>free</sub> | 0.221 / 0.237                  | 0.222 / 0.267              | 0.233 / 0.279                            |
| No. Atoms                                                       |                                |                            |                                          |
| Protein                                                         | 3718                           | 1755                       | 1957                                     |
| DNA                                                             | 1032                           | 407                        | 962                                      |
| Solvent                                                         | 410                            | 44                         | 163                                      |
| B Factors (Å <sup>2</sup> )                                     |                                |                            |                                          |
| Protein                                                         | 40.2                           | 46.0                       | 30.6                                     |
| DNA                                                             | 31.2                           | 55.2                       | 33.3                                     |
| Solvent                                                         | 42.4                           | 46.6                       | 35.4                                     |
| <b>R.m.s. deviations</b>                                        |                                |                            |                                          |
| Bond lengths (Å)                                                | 0.002                          | 0.002                      | 0.003                                    |
| Bond angles (°)                                                 | 0.4                            | 0.4                        | 0.6                                      |

\* Values in parenthesis correspond to highest resolution shell.

<sup>a</sup> R<sub>merge</sub> =  $\sum |I - \langle I \rangle| / \sum I$ , where I is the observed intensity and <I> is the averaged intensity from multiple observations.

<sup>b</sup> <I/σI> = averaged ratio of the intensity (I) to the error of the intensity (σI).

<sup>c</sup> R<sub>work</sub> =  $\sum |F_o - F_c| / \sum |F_o|$ , where F<sub>o</sub> and F<sub>c</sub> are the observed and calculated structure factors, respectively.

<sup>d</sup> R<sub>free</sub> was calculated using a randomly chosen subset (5%) of the reflections not used in refinement.
